# Supplementary material for: Profiling of the transcriptional response to all-trans retinoic acid in breast cancer cells reveals RARE-independent mechanisms of gene expression
Source: PubMed Central journal article supplement (PMC5709375; doi:10.1038/s41598-017-16687-6), 2017-11-30

# Profiling of the transcriptional response to all-trans retinoic acid in breast cancer cells reveals RARE-independent mechanisms of gene expression

Krysta Mila Coyle<sup>1</sup>, Selena Maxwell<sup>2</sup>, Margaret Lois Thomas<sup>1</sup>, Paola Marcato<sup>1,2</sup>

<sup>1</sup> Department of Pathology, Dalhousie University, Halifax NS Canada

<sup>2</sup> Department of Microbiology & Immunology, Dalhousie University, Halifax NS Canada

**Supplementary Figure S1. qPCR validation of genes identified by microarray.** Gene-specific qPCR primers were used to validate genes regulated by ALDH1A3 in (a) MDA-MB-231 and MDA-MB-468; (b) MDA-MB-231 alone; and (c) MDA-MB-468 alone. Gene-specific primers were also used to validate the genes regulated by atRA in (d) MDA-MB-231 and MDA-MB-468; (e) MDA-MB-231 alone; and (f) MDA-MB-468 alone. Statistical significance was determined via paired student's t-test (n=4; \* p<0.05; \*\* p<0.01; \*\*\* p<0.001).

**Supplementary Figure S2. Hierarchical clustering of all genes regulated by atRA or ALDH1A3 in one or both cell lines.** Z-scores for each gene listed in the heatmap were taken and clustered by gene and sample using the heatmap.2 function in the R environment.

**Supplementary Figure S3. DAC does not alter the atRA-inducibility of GPRC5B and IQGAP2.** qPCR was performed for GPRC5B and IQGAP2 in MDA-MB-231 and MDA-MB-468 cells following treatment with combinations of atRA, decitabine and trichostatin A. Statistical significance was determined via a 2-way ANOVA (n=4; \* p<0.05; \*\* p<0.01; \*\*\* p<0.001).

**Supplementary Figure S4. Changes in expression following DAC or atRA treatment are not accompanied by corresponding changes in DNA methylation.** (a) HOXB2 and CD22 expression was measured by qPCR in MDA-MB-231 and MDA-MB-468 cells following treatment with combinations of atRA, decitabine and trichostatin A. Statistical significance was determined via a 2-way ANOVA (n=4; \* p<0.05; \*\* p<0.01; \*\*\* p<0.001). (b) Methylation of HOXB2 and CD22 was compared following DAC treatment using the HumanMethylation450 array (n=3). (c) Expression of TINAGL1 and PRDM1 was measured by qPCR in MDA-MB-231 and MDA-MB-468 cells following treatment with combinations of atRA, decitabine and trichostatin A. Statistical significance was determined via a 2-way ANOVA (n=4; \* p<0.05; \*\* p<0.01; \*\*\* p<0.001).

**Supplementary Figure S5. Transcription factors associated with atRA-downregulated genes are largely unrelated between MDA-MB-231 and MDA-MB-468 cells.** Transcription factors (TFs) identified by PASTAA analysis were compared between cell lines and the lack of overlap is demonstrated in a Venn diagram.

**Supplementary Figure S6. Hierarchical clustering of transcription factors associated with atRA-upregulated genes in MDA-MB-231 or MDA-MB-468 cells.** Z-scores for each transcription factor identified by PASTAA analysis (as in Figure 4) were taken and clustered by gene using the heatmap.2 function in the R environment.

**Supplementary Figure S7. IRF1 knockdown affects the expression of IRF1-target genes RARRES3 and GBP4 but not TNFSF10.** (a) RARRES3 expression is compared between MDA-MB-231 and MDA-MB-468 cells by qPCR. Knockdown of IRF1 (as in Figure 5a) has a significant effect on RARRES3 expression. (b) GBP4 expression is compared between MDA-MB-231 and MDA-MB-468 cells by qPCR. Knockdown of IRF1 (as in Figure 5a) has a significant effect on GBP4 expression. (c) TNFSF10 expression is compared between MDA-MB-231 and MDA-MB-468 cells by qPCR. Knockdown of IRF1 (as in Figure 5a) has a significant effect on TNFSF10 expression. Statistical significance was determined by paired student's t-test (left panel) or by two-way ANOVA with repeated measures (centre and right panels). For all comparisons, n=4; \* p<0.05; \*\* p<0.01; \*\*\* p<0.001.

**Supplementary Table S1. Primers used for qPCR**

|                    | <b>Forward (5' -&gt; 3')</b> | <b>Reverse (5' -&gt; 3')</b> |
|--------------------|------------------------------|------------------------------|
| GAPDH <sup>8</sup> | GGAGTCAACGGATTTGGTCGTA       | TTCTCCATGGTGGTGAAGAC         |
| B2M <sup>78</sup>  | AGGCTATCCAGCGTACTCCA         | CGGATGGATGAAACCCAGACA        |
| GDF15              | TCCAGATTCCGAGAGTTGCG         | CGAGGTCGGTGTTTCCAATCT        |
| CDH5               | CTTCACCCAGACCAAGTACACA       | TCAACAAACAGAGAGCCCACA        |
| SCEL               | CCAAAGTCTCGACAGCCTCA         | CTGCTTTTGTGGTGAAGGGA         |
| IRF1               | TCGGATGCGCATGAGACC           | CATGCTTCCATGGGATCTGGA        |
| STAT1              | TGCCAGCCTGGTTTGGTAAT         | GTACCAAAGGATGGAGGCC          |
| CTSS               | ACATGGGTTCTTGTGGTGCT         | AGTTGAGCAATCCACCAGTT         |
| GBP4               | TCCTTGACATGGCTAGCAACA        | GCCAAGATATTTTGTCCCTACTCC     |
| RARRES3            | GGCTGTTGCTATCGGGTCAA         | GACCAACCATCTCCTTCGCA         |
| TNFSF10            | TGCGTGCTGATCGTGATCTT         | CTGCTTCAGCTCGTTGGTAAAG       |
| DHRS3              | TCTGTGATGTGGGCAACCG          | ATGGTGATGTCACCCACCTTC        |
| NRP2               | CACCAGAACTGCGAGTGGAT         | TGCAGTCGTGCTTCTCGATT         |
| PTGES              | CTTTTGTGCGCTGGATGCAC         | GTAGGTCACGGAGCGGATG          |
| RARB               | GGTTTCACTGGCTTGACCAT         | GGCAAAGGTGAACACAAGGT         |
| AMPH               | ATCGTATTGAGTGGCTGCC          | CACCTGGGCAGGGGAATAAG         |
| SSX1               | GAAGCCAGCAGAGGACGAAA         | CAGAAATATTTGCTTTTCTGGGGG     |
| ESM1               | CGGTTCTGGGGCATAGAAA          | ACACAAACCACAGTGGGTAA         |
| ARL14EPL           | ACCCATGCCCGAAGTGTAAC         | CCTGACTCAGTGACGATGGC         |
| CST2               | AGGAGGACAGGATAATCGAGGG       | AGTGGCCTTGTATACTCGCTG        |
| LTBP3              | AGATCTCAGCAGAAGTGCAGG        | TTCGAGCTCTCAATGCGGT          |
| TINAGL1            | CCTTTTCCCCGATCCAAGG          | GGTTCTTGGTCACACTGCCA         |
| CRISP2             | GGTTGCCCTGATGACTGTGA         | TGTTACAGCCAGCTGTATTCT        |
| CRISP3             | AAATACTTCATCCTGCTCTGAAAC     | GCAGTAAAAGCGGGATCCTTATC      |
| S100A7             | CCAAGCCTGCTGACGATGA          | GACATCGGCGAGGTAATTTGTG       |
| COLCA2             | TGTCGGAAAAACCGAAGGTGTA       | CCTGGTGTGCCCGTCTTT           |
| CD22               | TGGGAGAAAAATGGCAGGCT         | GGACGCTGTCTGTCCTATGG         |
| FOXA1              | CATGAAACCAGCGACTGGAAC        | TCATGTTGCTGACCGGGAC          |
| NFKBIZ             | GTCCGCTGTTGATGAGGAA          | GGAACCAAATGCACTGGCTG         |
| SRPX2              | ACCGGGGCTTTCGATTGATT         | TGAATGGTAGTGCGTGGCAT         |
| TMPRSS4            | TGAAGCTGCAGTTCCTACTC         | TTCTGCTTCGTAAAGCCCCAT        |
| LINC00857          | GAGGCCCTAATCCTCAAGGC         | TCTTTTCTTCACACCGCGT          |

**Supplementary Table S2. Genes with identified RARE sequences.**

| Gene                                                        | RARE sequence      |
|-------------------------------------------------------------|--------------------|
| <i>Associated with atRA-upregulated genes in MDA-MB-231</i> |                    |
| ELF3                                                        | AGGTCAGAGGGAGGTCA  |
| GBP4                                                        | TCAACTTGGAAATGAACT |
| DHRS3                                                       | GGTTCAGCCACAGGTCA  |
|                                                             | GGGTCATGGAGAGGTCA  |
|                                                             | AGGTCAGGGGAAGGACT  |
| LTBP3                                                       | GTGTCATTGGGAGGTCA  |
| NRIP1                                                       | AGGGCACCTGCAGTTCA  |
|                                                             | AGTTCAACAGGAGGTAA  |
|                                                             | AGGTCATTAGAGGACA   |
|                                                             | AGGTCACACAAAGGAGA  |
| NRP2                                                        | AGGTCACTAAGGGGTCA  |
|                                                             | AGTTCATTAATGTCA    |
|                                                             | GGATCACAAAGAGGTGA  |
| RARB                                                        | GGGTCATTGAAGTTA    |
|                                                             | GGTTCACCGAAAGTTCA  |
|                                                             | GGGTCACGGGCAGGTTA  |
|                                                             | AGTTCAACTAAAGTACA  |
| TINAGL1                                                     | GGTTTGCAAGGGAGGTCA |
| <i>Associated with atRA-upregulated genes in MDA-MB-468</i> |                    |
| ADH1C                                                       | GGGTCATTGAGAGTTCA  |
| CYP26A1                                                     | GGGTCACAGGCGGGTCA  |
| CYP27A1                                                     | TGAACTTCTTTCACCT   |
| FOXA1                                                       | TGACCTCCTCATGAACC  |
|                                                             | AGGTCAGGGGGAGGGGA  |
| SRPX2                                                       | TGACCTAAAGGTGAACT  |
| STRA6                                                       | AGGTGAACCCAAGTTCA  |
| TRIM31                                                      | AGGTCACAGCCAGTTCA  |
| ARHGEF6                                                     | GGGTCAGGGGAAGGGGA  |
| CLUL1                                                       | AGGTCACGCAAAGTTA   |
| CYP26A1                                                     | GGTTCACTAAGGGGTCA  |
|                                                             | AGTTCACTCGGATGTCA  |
|                                                             | GGGTCACAGGCGGGTCA  |
| DHRS3                                                       | GGTTCAGCCACAGGTCA  |
|                                                             | GGGTCATGGAGAGGTCA  |
|                                                             | AGGTCAGGGGAAGGACT  |
| EPB41L4A                                                    | AGGTCAGCATCAGGGCA  |
|                                                             | GGTTCATGAGGAGGTCA  |
| HOXB2                                                       | GGTTCAAGAAGAGTTCA  |
| IFFO2                                                       | GGGTGTGGGGAGGTCA   |

|       |                    |
|-------|--------------------|
| LRG1  | TGGTCAGCTGGAGGTCA  |
|       | AGGGCAGGGGAGGGTCA  |
| NAV2  | TGGTCACTCACAGGTCA  |
|       | GGGGCAGGGGACAGGTCA |
| NRP2  | AGGTCACTAAGGGGTCA  |
|       | AGTTCATTAATGTCA    |
|       | GGATCACAAAGAGGTGA  |
| PELI2 | GGGTCACACACAGTTCA  |

| Gene                                                           | RARE sequence      |
|----------------------------------------------------------------|--------------------|
| <i>Associated with ALDH1A3-upregulated genes in MDA-MB-231</i> |                    |
| CCL2                                                           | TGACCCCTCCTTCACCC  |
| PTGFRN                                                         | TGAACCATTTGATGACCC |
| DHRS3                                                          | GGTTCAGCCACAGGTCA  |
|                                                                | GGGTCATGGAGAGGTCA  |
|                                                                | AGGTCAGGGGAAGGACT  |
| LTBP3                                                          | GTGTCATTGGGAGGTCA  |
| NRIP1                                                          | AGGGCACCTGCAGTTCA  |
|                                                                | AGTTCAACAGGAGGTAA  |
|                                                                | AGGTCATTAGAGGACA   |
|                                                                | AGGTCACACAAAGGAGA  |
| NRP2                                                           | AGGTCACTAAGGGGTCA  |
|                                                                | AGTTCATTAATGTCA    |
|                                                                | GGATCACAAAGAGGTGA  |
| RARB                                                           | GGGTCATTGAAGTTA    |
|                                                                | GGTTCACCGAAAGTTCA  |
|                                                                | GGGTCACGGGCAGGTTA  |
| <i>Associated with ALDH1A3-upregulated genes in MDA-MB-468</i> |                    |
| ALDH2                                                          | AGGTCAAGCTGAGTTGA  |
| CEBPA                                                          | TGAACCAGAATTCACCC  |
| CYP27A1                                                        | TGAACTTCTTTCACCT   |
| GSTA2                                                          | TCACCCCTCGCCTGAACC |
| S100A7                                                         | GGGTGAAGTTGGGGTGA  |
| S100A7A                                                        | TCACCCCAACTTCACCC  |
| ARHGEF6                                                        | GGGTCAGGGGAAGGGGA  |
| CACNA1D                                                        | GGGTTAGTGAGAGGTCA  |
|                                                                | AGGACACGGAGAGGTCA  |
| DHRS3                                                          | GGTTCAGCCACAGGTCA  |
|                                                                | GGGTCATGGAGAGGTCA  |
|                                                                | AGGTCAGGGGAAGGACT  |
| EPB41L4A                                                       | AGGTCAGCATCAGGGCA  |
| NFKBIZ                                                         | GGGTCATGGTGAAGTGA  |
| PELI2                                                          | GGGTCACACACAGTTCA  |

**Supplementary Table S3. Putative methylated atRA-inducible genes.**

| Cluster | Gene Symbol  | RA-upregulated in?      | RARE?             |
|---------|--------------|-------------------------|-------------------|
| i       | ST3GAL1      | MDA-MB-468              |                   |
|         | RASSF6       | MDA-MB-468              | DR2 <sup>29</sup> |
|         | TP53INP1     | MDA-MB-468              |                   |
| ii      | SLC46A3      | MDA-MB-468              |                   |
|         | AGR2         | MDA-MB-468              |                   |
|         | GPRC5B       | MDA-MB-468              |                   |
|         | LOC105378744 | MDA-MB-468              |                   |
| iii     | HLA-B        | MDA-MB-231              |                   |
|         | LOC105373682 | MDA-MB-468 / MDA-MB-231 |                   |
|         | TINAGL1      | MDA-MB-231              | DR5 (oPOSSUM)     |
|         | IQGAP2       | MDA-MB-468              |                   |
|         | HOXB2        | MDA-MB-468              | DR5 (oPOSSUM)     |
|         | TNFSF15      | MDA-MB-468              |                   |
|         | PRDM1        | MDA-MB-468              |                   |
|         | SRPX2        | MDA-MB-468              | DR5 <sup>25</sup> |
|         | LOC105375401 | MDA-MB-468              |                   |
|         | TFPI2        | MDA-MB-468              |                   |
| iv      | LOC105376382 | MDA-MB-468              |                   |
|         | SAMD9        | MDA-MB-468              |                   |
|         | LINC00857    | MDA-MB-231              |                   |

**a** Genes commonly regulated by ALDH1A3

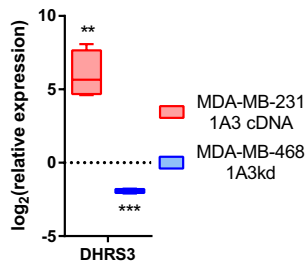

**d** Genes commonly regulated by atRA

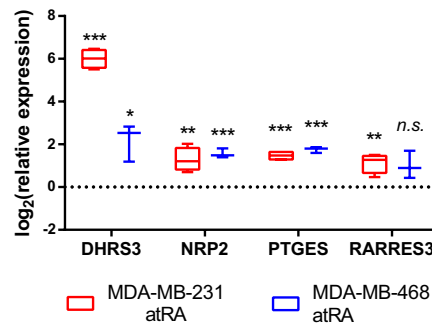

**b** Genes regulated by ALDH1A3 in MDA-MB-231

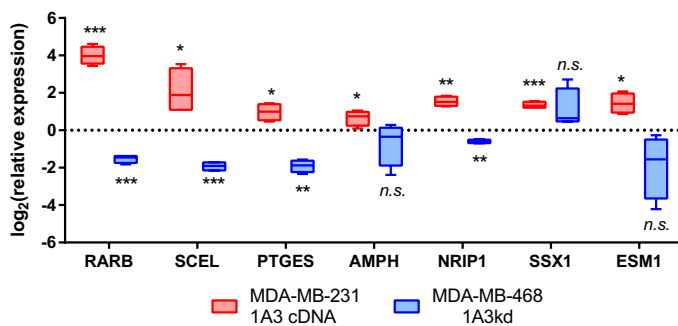

**e** Genes regulated by atRA in MDA-MB-231

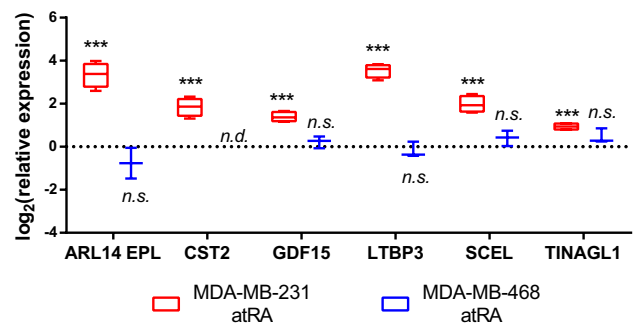

**c** Genes regulated by ALDH1A3 in MDA-MB-468

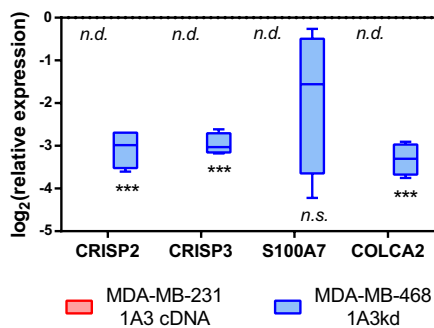

**f** Genes regulated by atRA in MDA-MB-468

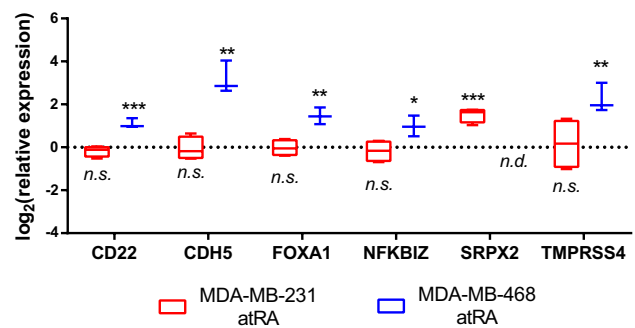

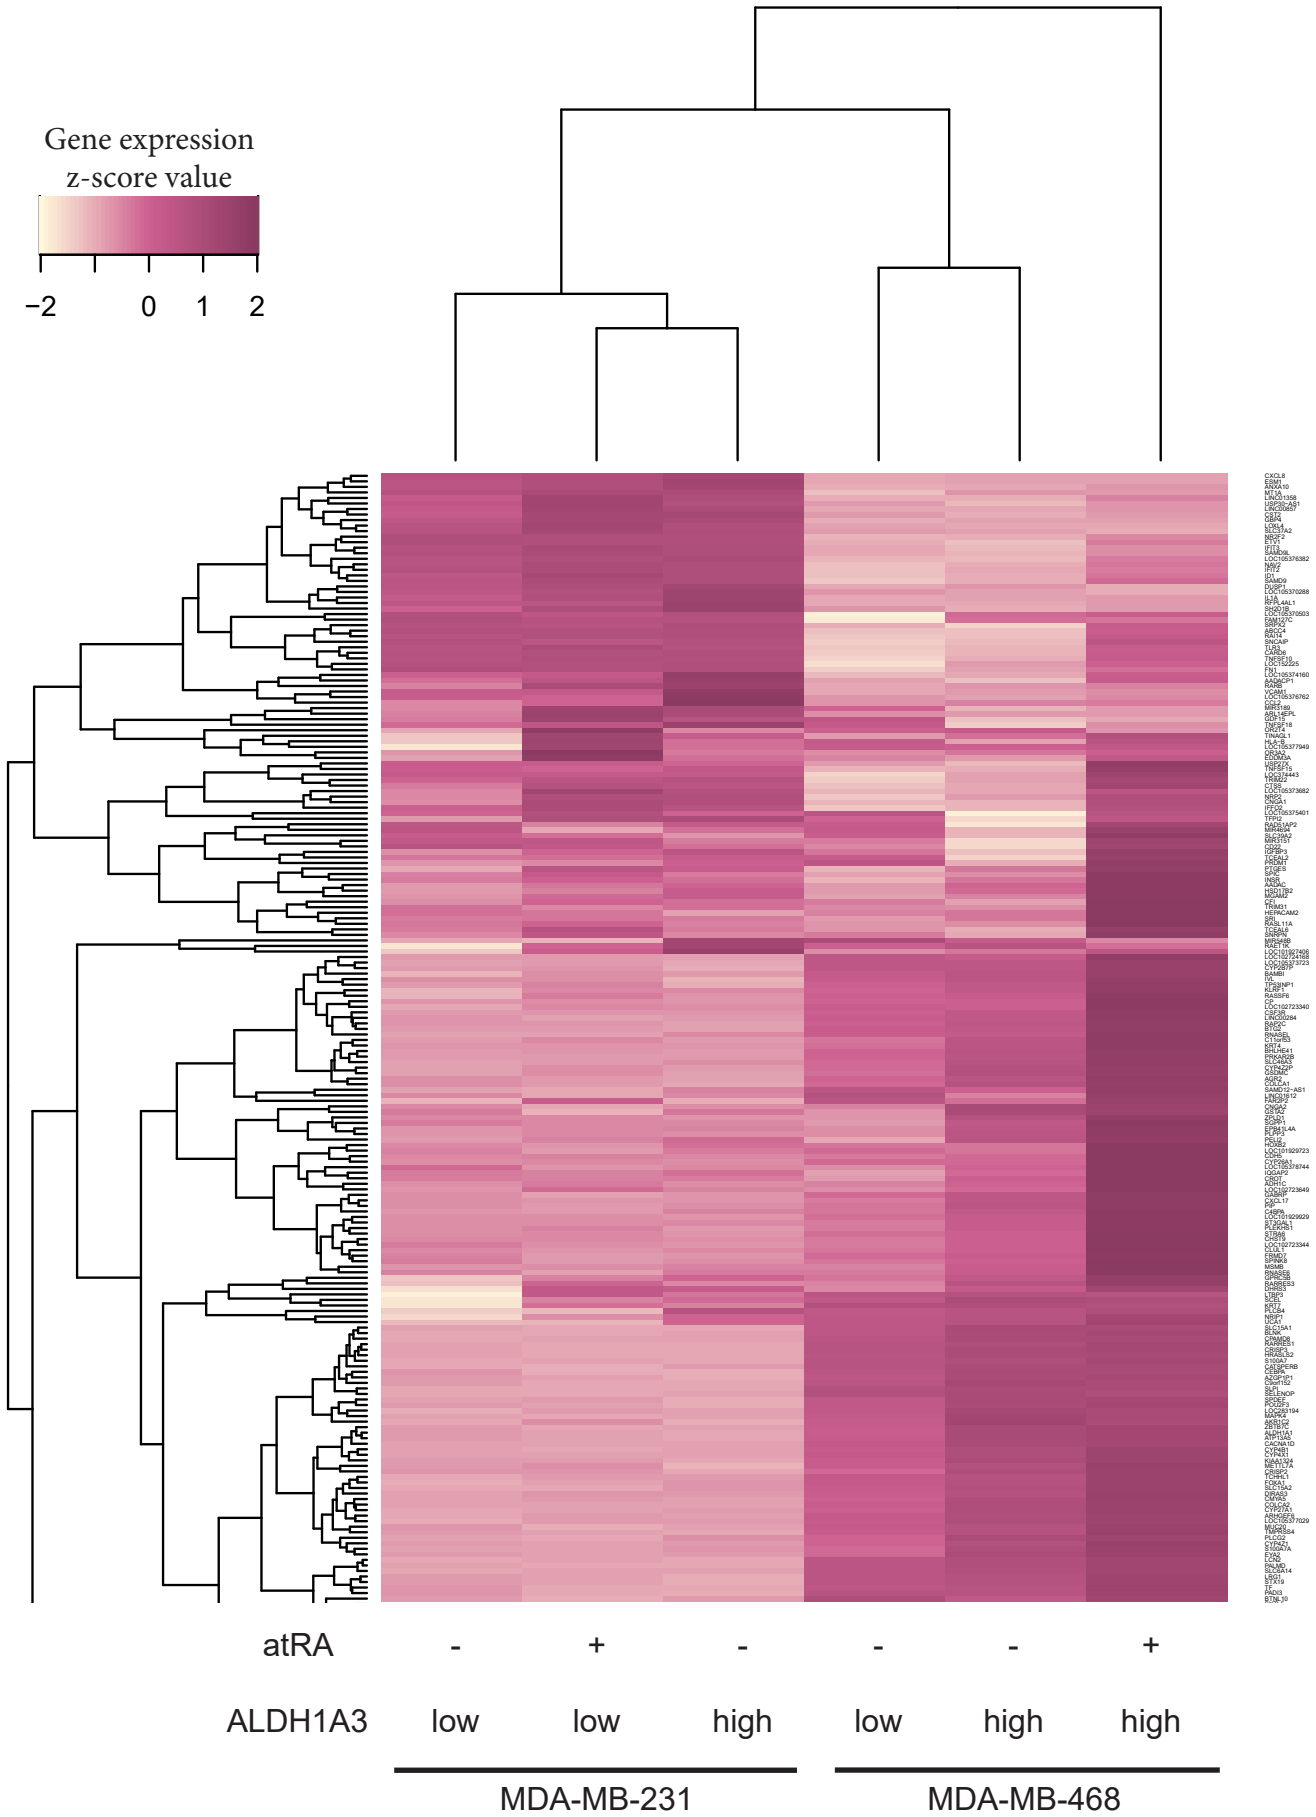

Supplementary Figure S2

## Expression of atRA-inducible genes after DAC and/or TSA treatment

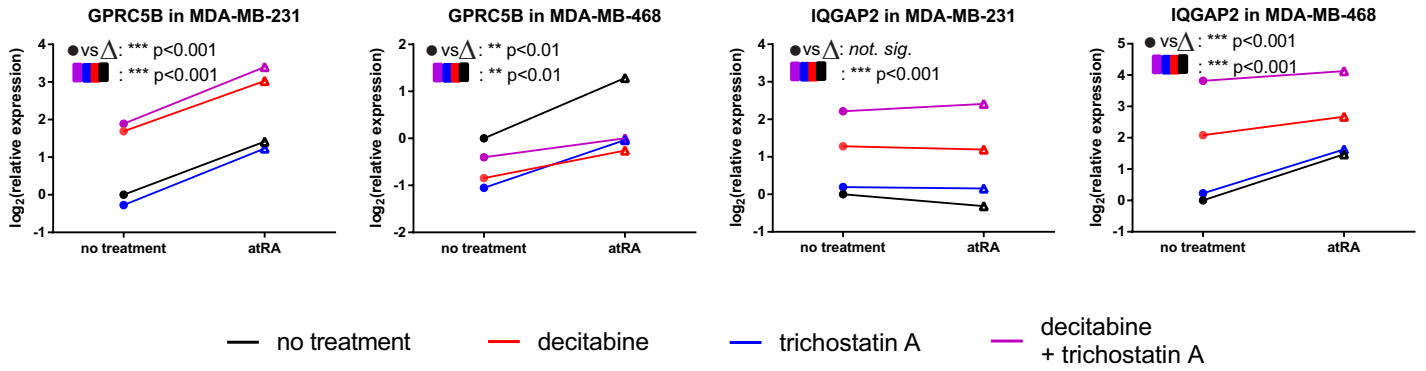



## Expression of atRA-inducible genes after DAC and/or TSA treatment

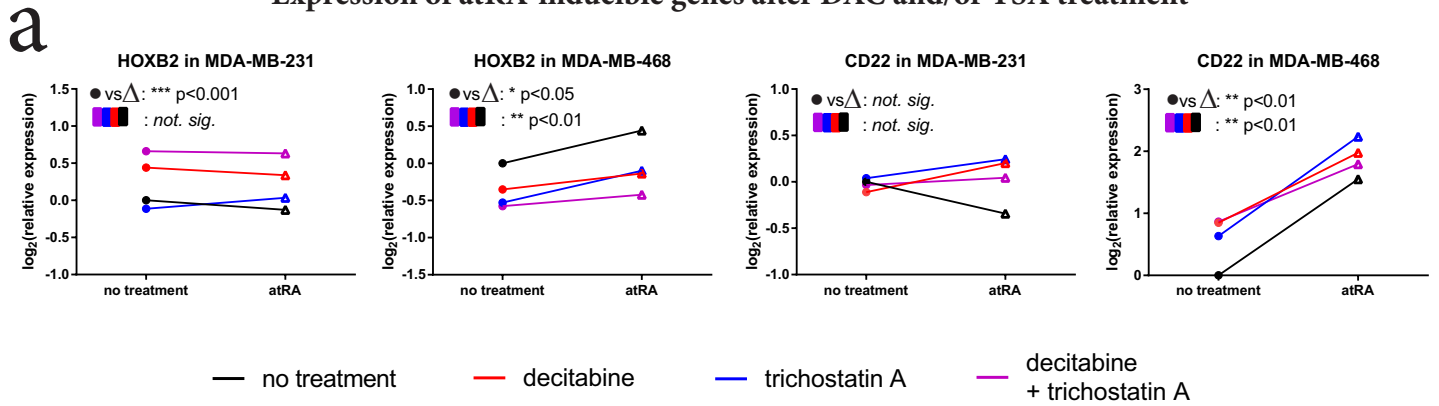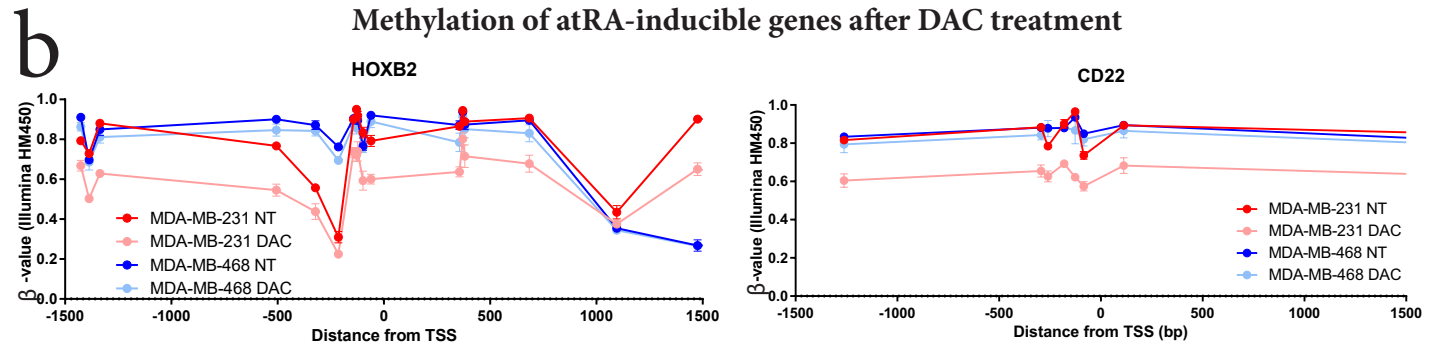

## Methylation of atRA-inducible genes after DAC and/or TSA treatment

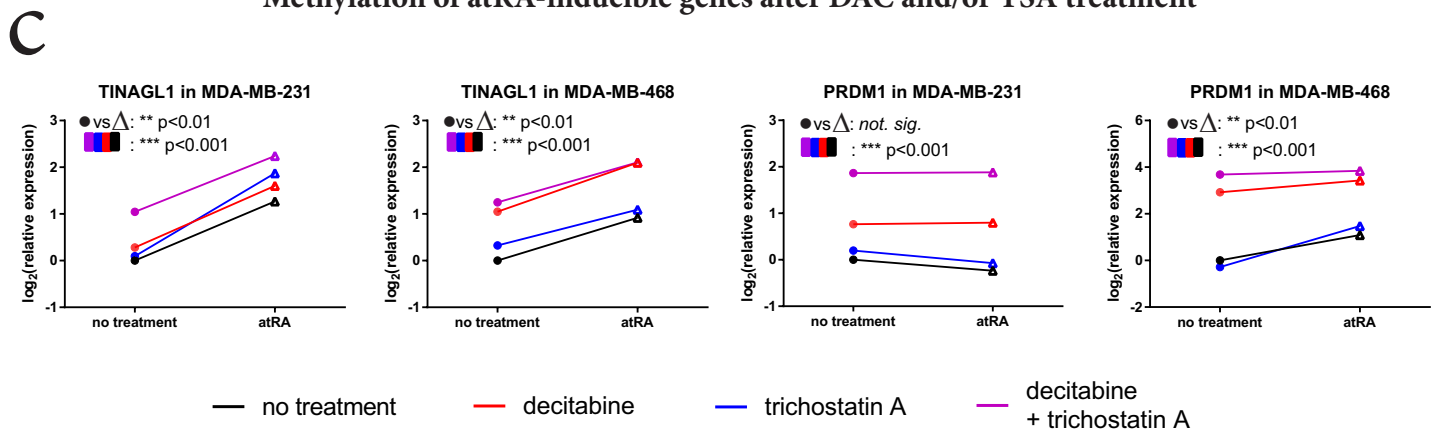

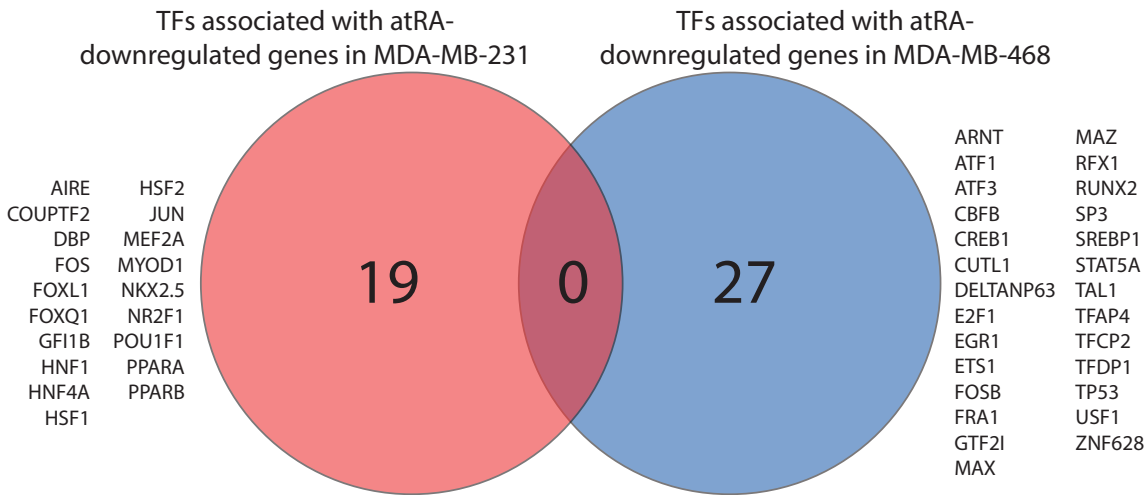

### Clustering of atRA-associated transcription factors

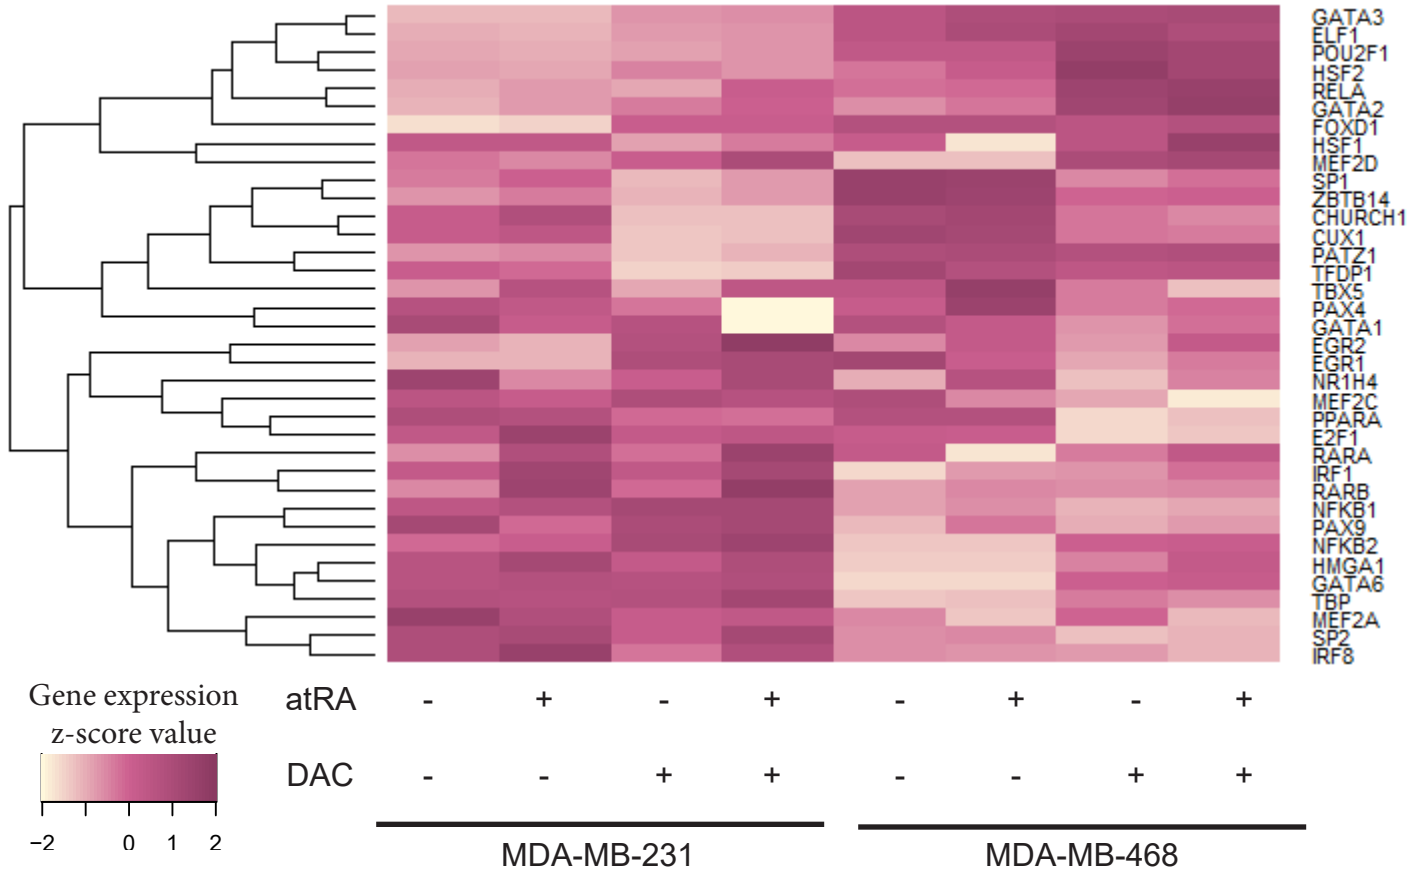

**a****Effect of IRF1 knockdown on RARRES3 expression**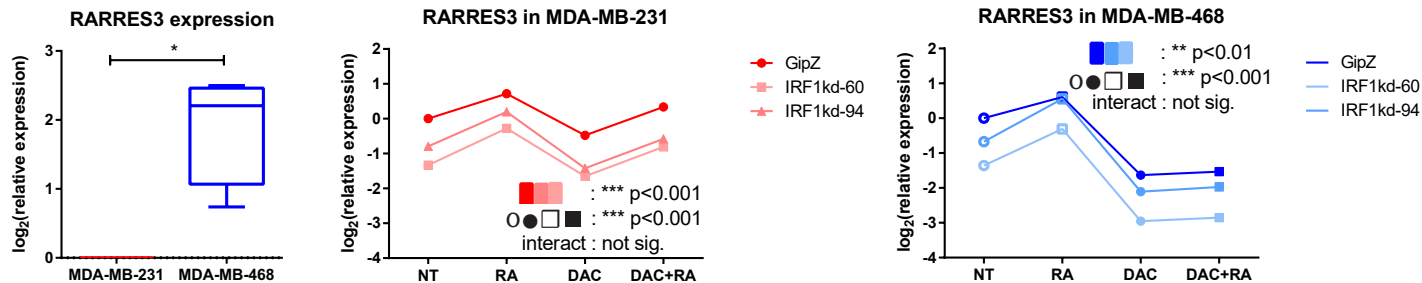**b****Effect of IRF1 knockdown on GBP4 expression**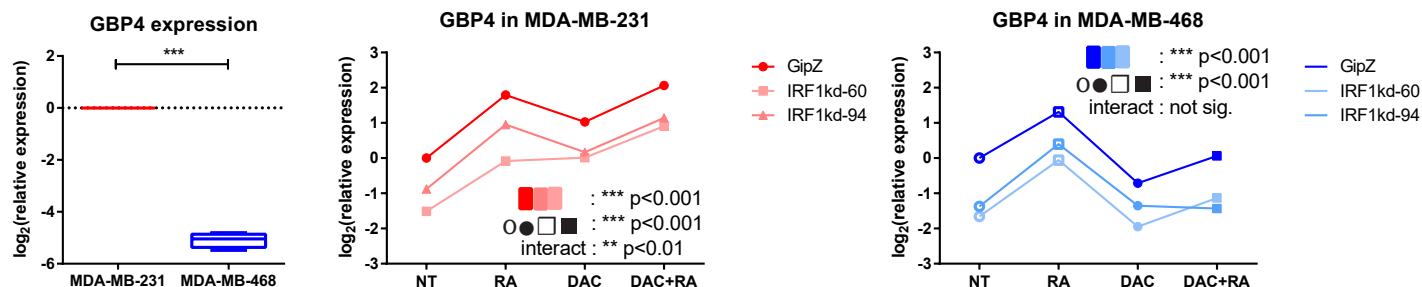**c****Effect of IRF1 knockdown on TNFSF10 expression**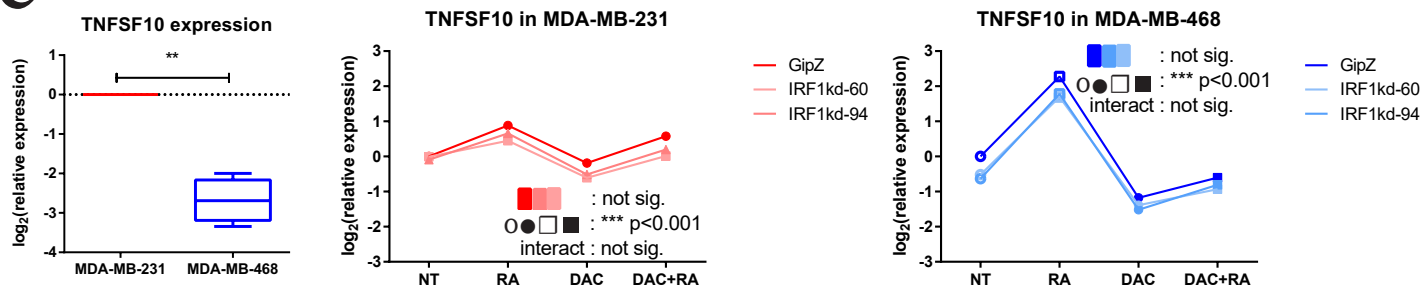

Supplement: 41598_2017_16687_MOESM1_ESM.pdf [file 41598_2017_16687_MOESM1_ESM.pdf]
